# Supplementary material for: The microtubule polymerase Stu2 promotes oligomerization of the γ-TuSC for cytoplasmic microtubule nucleation
Source: eLife. 2018 Sep 17;7:e39932. doi: 10.7554/eLife.39932 (PMC6158006; doi:10.7554/eLife.39932)
Supplement: Supplementary file 1. [file elife-39932-supp1.xlsx]

## Sheet: yeast
Table S1: Yeast strains used in this study
Strain	Genotype	Source/reference	Figure
DR330	MATa ura3-52::pRS306-pADH1-OsTIR1-9Myc lys2-801 ade2-101::pRS302-yeGFP-TUB1 trp1Δ63 his3Δ200 leu2Δ1 Tub4-IAA17-KanMX4 Stu2-3HA-IAA17-His3MX6	this study	7
DR336	MATa ura3-52::pRS306-pADH1-OsTIR1-9Myc lys2-801 ade2-101::pRS302-yeGFP-TUB1 trp1Δ63 his3Δ200 leu2Δ1 SPC42-mCherry-hphNT1 Tub4-IAA17-KanMX4 Stu2-3HA-IAA17-His3MX6	this study	7
DR354	MATa ura3-52::pRS306-pADH1-OsTIR1-9Myc lys2-801 ade2-101::pRS302-yeGFP-TUB1 trp1Δ63 his3Δ200 leu2Δ1 SPC42-mCherry-hphNT1	this study	7
DR355	MATa ura3-52::pRS306-pADH1-OsTIR1-9Myc lys2-801 ade2-101::pRS302-yeGFP-TUB1 trp1Δ63 his3Δ200 leu2Δ1 SPC42-mCherry-hphNT1 Stu2-IAA17-KanMX4	this study	7
DR358	MATa ura3-52::pRS306-pADH1-OsTIR1-9Myc lys2-801 ade2-101::pRS302-yeGFP-TUB1 trp1Δ63 his3Δ200 leu2Δ1 SPC42-mCherry-hphNT1 Tub4-IAA17-KanMX4	this study	7
DR359	MATa ura3-52::pRS306-pADH1-OsTIR1-9Myc lys2-801 ade2-101::pRS302-yeGFP-TUB1 trp1Δ63 his3Δ200 leu2Δ1::pRS305-6xHis-TEVCS-STU2 SPC42-mCherry-hphNT1 Stu2-IAA17-KanMX4	this study	7
DR360	MATa ura3-52::pRS306-pADH1-OsTIR1-9Myc lys2-801 ade2-101::pRS302-yeGFP-TUB1 trp1Δ63 his3Δ200 leu2Δ1::pRS305-6xHis-TEVCS-stu2ΔCC SPC42-mCherry-hphNT1 Stu2-IAA17-KanMX4	this study	7
DR361	MATa ura3-52::pRS306-pADH1-OsTIR1-9Myc lys2-801 ade2-101::pRS302-yeGFP-TUB1 trp1Δ63 his3Δ200 leu2Δ1::pRS305-6xHis-TEVCS-stu2ΔMT SPC42-mCherry-hphNT1 Stu2-IAA17-KanMX4	this study	7
DR363	MATa ura3-52::pRS306-pADH1-OsTIR1-9Myc lys2-801 ade2-101::pRS302-yeGFP-TUB1 trp1Δ63 his3Δ200 leu2Δ1::pRS305-6xHis-TEVCS-stu2TOGAA SPC42-mCherry-hphNT1 Stu2-IAA17-KanMX4	this study	7
DR365	MATa ura3-52::pRS306-pADH1-OsTIR1-9Myc lys2-801 ade2-101::pRS302-yeGFP-TUB1 trp1Δ63 his3Δ200 leu2Δ1::pRS305-6xHis-TEVCS-stu2ΔC SPC42-mCherry-hphNT1 Stu2-IAA17-KanMX4	this study	7
DR372	MATa ura3-52::pRS306-pADH1-OsTIR1-9Myc lys2-801 ade2-101::pRS302-yeGFP-TUB1 trp1Δ63 his3Δ200 leu2Δ1 Tub4-IAA17-KanMX4 Stu2-3HA-IAA17-His3MX6 Stu2-mCherry-natNT2	this study	7
DR373	MATa ura3-52::pRS306-pADH1-OsTIR1-9Myc lys2-801 ade2-101::pRS302-yeGFP-TUB1 trp1Δ63 his3Δ200 leu2Δ1 Tub4-IAA17-KanMX4 Stu2-3HA-IAA17-His3MX6 Spc72-mCherry-natNT2	this study	7
DR374	MATa ura3-52::pRS306-GFP-TUB1 trp1Δ63 his3Δ200 leu2Δ1 kar1Δ15 Stu2-mCherry-natNT2	this study	7
DR375	MATa ura3-52::pRS306-GFP-TUB1 trp1Δ63 his3Δ200 leu2Δ1 kar1Δ15 Spc72-mCherry-natNT2	this study	7
ESM356	MATa ura3-52 trp1Δ63 his3Δ200 leu2Δ1	Pereira et al., 2001	Parental strain
ESM448	MATa ura3-52 lys2-801 ade2-101 trp1Δ63 his3Δ200 leu2Δ1 Δspc72::KanMx6 pRS316-SPC72	Knop and Schiebel, 1998	Parental strain
GPY657	MATa ura3-52::pRS306-GFP-TUB1 trp1Δ63 his3Δ200 leu2Δ1 kar1Δ15
YJP011	MATa ura3-52 leu2Δ1 his3Δ200 trp1Δ63 STU2-yeGFP-kanMX4	this study	S4
YJP035	MATa ura3-52 leu2Δ1 his3Δ200 trp1Δ63 kar1-Δ15 STU2-yeGFP-kanMX4 SPC72-mCherry-hphNT1	this study	3, 4, S3
YJP054	MATa ura3-52::pRS306-mCherry-TUB1 leu2Δ1 his3Δ200 trp1Δ63 kar1-Δ15 STU2-yeGFP-kanMX4	this study	S3
YJP056	MATa ura3-52 leu2Δ1 his3Δ200 trp1Δ63 stu2ΔC(Δ855-888 aa)-yeGFP-kanMX4	this study	S4
YJP077	MATa ura3-52::pRS306-mCherry-TUB1 leu2Δ1 his3Δ200 trp1Δ63 kar1-Δ15 spc72ΔStu2(Δ116-230 aa) SPC72-yeGFP-kanMX4	this study	3, S3
YJP119	MATa ura3-52 leu2Δ1 his3Δ200 trp1Δ63 kar1-Δ15 spc72ΔStu2(Δ116-230 aa) STU2-yeGFP-kanMX4 TUB4-mCherry-hgh	this study	3, S3
YJP149	MATa ura3-52 leu2Δ1 his3Δ200 trp1Δ63 kar1-Δ15 SPC72-mCherry-hphNT1 KIP3-yeGFP-kanMX4	this study	4, S3
YJP150	MATa ura3-52::pRS306-mCherry-TUB1 leu2Δ1 his3Δ200 trp1Δ63 kar1-Δ15 KIP3-yeGFP-kanMX4	this study	S3
YJP160	MATa ura3-52 lys2-801 ade2-101 trp1Δ63 his3Δ200 leu2Δ1::pRS305-Spc72-CM1-3A Δspc72::KanMx6 pRS316-SPC72	this study	1
YJP161	MATa ura3-52 lys2-801 ade2-101 trp1Δ63 his3Δ200 leu2Δ1::pRS305-Spc72 Δspc72::KanMx6 pRS316-SPC72	this study	1
YJP170-1	MATa ura3-52::pRS306-pADH1-OsTIR1-9Myc leu2Δ1 his3Δ200 trp1Δ63 kar1-Δ15 STU2-yeGFP-kanMX4 BIM1-3HA-IAA17-natNT2	this study	S4
YJP171-1	MATa ura3-52::pRS306-pADH1-OsTIR1-9Myc leu2Δ1 his3Δ200 trp1Δ63 kar1-Δ15 STU2-yeGFP-kanMX4 KIP3-3HA-IAA17-natNT2	this study	S4
YJP172-1	MATa ura3-52::pRS306-pADH1-OsTIR1-9Myc leu2Δ1 his3Δ200 trp1Δ63 kar1-Δ15 STU2-yeGFP-kanMX4 KAR9-3HA-IAA17-natNT2	this study	S4
YJP182	MATa ura3-52::pRS306-pADH1-OsTIR1-9Myc leu2Δ1 his3Δ200 trp1Δ63 kar1-Δ15 STU2-yeGFP-kanMX4 KAR9-3HA-IAA17-natNT2 TUB4-mCherry-hphNT1	this study	4
YJP183-1	MATa ura3-52::pRS306-pADH1-OsTIR1-9Myc leu2Δ1 his3Δ200 trp1Δ63 kar1-Δ15 STU2-yeGFP-kanMX4 KAR3-3HA-IAA17-natNT2	this study	S4
YJP186-1	MATa ura3-52::pRS306-pADH1-OsTIR1-9Myc leu2Δ1 his3Δ200 trp1Δ63 kar1-Δ15 spc72ΔStu2(Δ116-230 aa) STU2-yeGFP-kanMX4 KAR9-3HA-IAA17-natNT2	this study	S4
YJP209	MATa ura3-52::pRS306-pADH1-OsTIR1-9Myc leu2Δ1 his3Δ200 trp1Δ63::pRS304-mCherry-TUB1 kar1-Δ15 STU2-yeGFP-kanMX4 KAR9-3HA-IAA17-natNT2 SPC42-mTurquoise2-hphNT1	this study	4
YJP211	MATa ura3-52::pRS306-pADH1-OsTIR1-9Myc leu2Δ1 his3Δ200 trp1Δ63::pRS304-mCherry-TUB1 kar1-Δ15 spc72ΔStu2(Δ116-230 aa) STU2-yeGFP-kanMX4 KAR9-3HA-IAA17-natNT2 SPC42-mTurquoise2-hphNT1	this study	4
YJP218	MATa ura3-52::pRS306-pADH1-OsTIR1-9Myc leu2Δ1::pRS305-GFP-TUB1 his3Δ200 trp1Δ63 KAR9-3HA-IAA17-natNT2 SPC42-mCherry-hphNT1	this study	5, S5
YJP219	MATa ura3-52::pRS306-pADH1-OsTIR1-9Myc leu2Δ1::pRS305-GFP-TUB1 his3Δ200 trp1Δ63 spc72ΔStu2(Δ116-230 aa) KAR9-3HA-IAA17-natNT2 SPC42-mCherry-hphNT1	this study	5, S5
YJP225	MATa ura3-52::pRS306-mCherry-TUB1 leu2Δ1his3Δ200 trp1Δ63 kar1-Δ15 SPC72-yeGFP-klTRP1 SPC42-mTurquoise2-hphNT1	this study	S4
YJP226	MATa ura3-52::pRS306-mCherry-TUB1 leu2Δ1 his3Δ200 trp1Δ63 kar1-Δ15 stu2ΔC(Δ855-888 aa)-yeGFP-kanMX4 SPC42-CFP-His3MX6	this study	S4
YJP227	MATa ura3-52 leu2Δ1::pRS305-GFP-TUB1 his3Δ200 trp1Δ63 kar1-Δ15 stu2ΔC(Δ855-888 aa)-mCherry-hphNT1 SPC42-CFP-His3MX6	this study	S4
YJP228	MATa ura3-52::pRS306-mCherry-TUB1 leu2Δ1 his3Δ200 trp1Δ63 kar1-Δ15 spc72ΔStu2(Δ116-230 aa) SPC72-yeGFP-kanMX4 SPC42-CFP-His3MX6	this study	S4
YJP230	MATa ura3-52::pRS306-pADH1-OsTIR1-9Myc leu2Δ1 his3Δ200 trp1Δ63::pRS304-mCherry-TUB1 kar1-Δ15 SPC72-yeGFP-kanMX4 KAR9-3HA-IAA17-natNT2	this study	4
YJP240	MATa ura3-52 lys2-801 ade2-101 trp1Δ63 his3Δ200 leu2Δ1::pRS305 Δspc72::KanMx6 pRS316-SPC72	this study	1
YJP244	MATa ura3-52::pRS306-pADH1-OsTIR1-9Myc leu2Δ1 his3Δ200 trp1Δ63::pRS304-mCherry-TUB1 kar1-Δ15 spc72ΔStu2(Δ116-230 aa) STU2-yeGFP-kanMX4 KAR9-3HA-IAA17-natNT2 TUB4-mTurquoise2-hphNT1	this study	4, S4
YJP272	MATa ura3-52::pRS306-pADH1-OsTIR1-9Myc leu2Δ1 his3Δ200 trp1Δ63::pRS304-mCherry-TUB1 kar1-Δ15 spc72ΔStu2(Δ116-230 aa) STU2-yeGFP-kanMX4 Kar9-3HA-His3MX6 TUB4-mTurquoise2-hphNT1	this study	4, S4
YMK137-1	MATa ura3-52 leu2Δ1 his3Δ200 trp1Δ63 kar1-Δ15	Pereira et al., 1999	Parental strain
YPH499	MATa ura3-52 lys2-801 ade2-101 trp1Δ63 his3Δ200 leu2Δ1	Sikorski and Hieter, 1989	Parental strain
YSE380	MATa ura3-52 leu2Δ1 his3Δ200 trp1Δ63 CSE4-yeGFP-kanMX4 Δste2::natNT1	Erlemann et al., 2012	3, 4, S3
YSE399	MATa ura3-52::pRS306-mCherry-TUB1 leu2Δ1 his3Δ200 trp1Δ63 kar1-Δ15 SPC72-yeGFP-klTRP1	Erlemann et al., 2012	3, 4
YSE417	MATa ura3-52::pRS306-mCherry-TUB1 leu2Δ1his3Δ200 trp1Δ63 kar1-Δ15 KAR9-GFP-kanMX6	this study	S3
YSE423	MATa ura3-52 leu2Δ1 his3Δ200 trp1Δ63 kar1-Δ15 BIM1-GFP-kanMX6 SPC72-mCherry-hphNT1	this study	4, S3
YSE424	MATa ura3-52 leu2Δ1 his3Δ200 trp1Δ63 kar1-Δ15 KAR3-GFP-kanMX6 SPC72-mCherry-hphNT1	this study	4, S3
YSE440	MATa ura3-52 leu2Δ1 his3Δ200 trp1Δ63 kar1-Δ15 KAR9-yeGFP-kanMX6 SPC72-mCherry-hphNT1	this study	4, S3
