# Supplementary material for: The microtubule polymerase Stu2 promotes oligomerization of the γ-TuSC for cytoplasmic microtubule nucleation
Source: eLife. 2018 Sep 17;7:e39932. doi: 10.7554/eLife.39932 (PMC6158006; doi:10.7554/eLife.39932)
Supplement: Supplementary file 2. [file elife-39932-supp2.xlsx]

## Sheet: plasmids
Table S2: Plasmids used in this study
Name	Discription	Source/reference
pAFS125	pRS306-PromTUB1-GFP-TUB1	A. Murray
pAK010-1	pRS304-mCherry-TUB1	this study
pAK011-1	pRS306-pHis3-mCherry-TUB1	Khmelinskii et al., 2009
pDR087	pRS315-6xHis-TEVCS-STU2	this study
pDR088	pRS315-6xHis-TEVCS-stu2-ΔCC	this study
pDR089	pRS315-6xHis-TEVCS-stu2-ΔMT	this study
pDR091	pRS315-6xHis-TEVCS-stu2-TOGAA	this study
pDR093	pRS315-6xHis-TEVCS-stu2-ΔC	this study
pDR094	pRS305-6xHis-TEVCS-STU2	this study
pDR095	pRS305-6xHis-TEVCS-stu2-ΔCC	this study
pDR096	pRS305-6xHis-TEVCS-stu2-ΔMT	this study
pDR098	pRS305-6xHis-TEVCS-stu2-TOGAA	this study
pDR100	pRS305-6xHis-TEVCS-stu2-ΔC	this study
pDR115	pRS414-SPC97-mCherry	this study
pDR116	pRS315-SPC98-mCherry	this study
pERL002-1	pRS305-GFP-TUB1	this study
pHM82-5	CFP-His3MX6	this study
pIK96	p413-PromGDP-TagBFP-NLS	M.Knop
pJP004	expression of GST-Spc72N = pGEX6p1-SPC72_1-267	this study
pJP020	expression of GST-Spc72NCM1 = pGEX6P1-spc72-CM1-3A_1-267	this study
pJP023	expression of 6His-Stu2ΔC = pFastBac-HTA-TEV-stu2ΔC(Δaa855-888)	this study
pJP025	expression of GST-Spc72NΔStu2 = pGEX6P1-spc72ΔStu2(Δaa116-230)_1-267	this study
pJP029	expression of 6His-Stu2TOGAA = pFASTBac-HTA-TEV-stu2-TOGAA	this study
pJP038	expression of 6His-Stu2TOGAA ΔCC = pFASTBac-HTA-TEV-stu2-TOGAA ΔCC	this study
pJP044	expression of 6His-Stu2TOGAA ΔMT = pFASTBac-HTA-TEV-stu2-TOGAA ΔMT	this study
pJP046	expression of 6His-Stu2TOGAA MT11- = pFASTBac-HTA-TEV-stu2-TOGAA MT11-	this study
pJP059	3HA-IAA17-natNT2	this study
pJP064	expression of 6His-Stu2MT11- = pFASTBac-HTA-TEV-stu2-MT11-	this study
pJP065	expression of 6His-Stu2ΔMT = pFASTBac-HTA-TEV-stu2-ΔMT	this study
pJP065	expression of 6His-Stu2ΔMT = pFASTBac-HTA-TEV-stu2-ΔMT	this study
pJP066	expression of 6His-Stu2ΔCC = pFASTBac-HTA-TEV-stu2-ΔCC	this study
pJP066	expression of 6His-Stu2ΔCC = pFASTBac-HTA-TEV-stu2-ΔCC	this study
pKS134	pFA6a-natNT2	M. Knop
pLG186	expression of 6His-Stu2WT = pFastBac-HTA-TEV-STU2	this study
pMaM56	pFA6a-mCherry-natNT2	M. Knop
pMaM57	pFA6a-mCherry-hphNT1	M. Knop
pNHK53	pRS306-pADH1-OsTIR1-9Myc	Nishimura et al., 2009
pRS305	URA3-based integration plasmid	Sikorski and Hieter, 1989
pRS315	CEN based Leu plasmid
pSM1027	pRS302-yeGFP-TUB1
pSM447	pRS316-SPC72	Knop and Schiebel, 1998
pTC316	pRS305-spc72-CM1-3A	this study
pTU117-1	pRS305-SPC72	Usui et al., 2003
pYM Turquoise-hphNT1	mTurquoise2-hphNT1	G.Pereira
pYM12	yeGFP-kanMX4	Janke et al., 2004
pYM2	3HA-His3MX6	Janke et al., 2004
pYM26	yeGFP-klTRP1	Janke et al., 2004
